# Supplementary material
Source: HighWire-hosted journal article supplement (https://ard.bmj.com/content/79/9/1243)
Supplement: inline-supplementary-material-1 [file inline-supplementary-material-1.pdf]

**Supplementary Table 1: Effect of baseline variables on disease response at 4 months (unadjusted regression analysis)**

| <b>Variable</b>                                  | <b>Estimate</b> | <b>95% CI</b> | <b>P-value</b> |
|--------------------------------------------------|-----------------|---------------|----------------|
| ANCA status at enrolment (anti-MPO vs. anti-PR3) | 1.23            | 0.412-4.54    | 0.727          |
| Type of relapse (non-severe vs. severe)          | 2.93            | 0.915-13.1    | 0.101          |
| Glucocorticoid induction regimen (1B vs. 1A)     | 1.04            | 0.316-2.96    | 0.948          |
| BVAS/WG score                                    | 0.878           | 0.712-1.1     | 0.236          |
| Ear, nose and throat involvement (No vs. Yes)    | 0.924           | 0.327-2.83    | 0.884          |
| Renal involvement (No vs. Yes)                   | 1.5             | 0.534-4.36    | 0.444          |
| Age (years)                                      | 1.02            | 0.983-1.05    | 0.339          |

1A: higher dose glucocorticoid induction regimen, starting at 1 mg/kg/day (maximum starting dose 60 mg/day); 1B: lower dose glucocorticoid induction regimen, starting at 0.5 mg/kg/day (maximum starting dose 30 mg/day).
