# Supplementary material
Source: HighWire-hosted journal article supplement (https://ard.bmj.com/content/79/9/1243)
Supplement: inline-supplementary-material-2 [file inline-supplementary-material-2.pdf]

**Supplementary Table 2: Line listing of severe adverse events**

| <b>System Order Class (SOC)</b>                                     | <b>Preferred Term (PT)</b>            | <b>Number</b> |
|---------------------------------------------------------------------|---------------------------------------|---------------|
| <b>Cardiac disorders</b>                                            | Acute coronary syndrome               | 1             |
|                                                                     | Cardiac arrest                        | 1             |
| <b>Gastrointestinal disorders</b>                                   | Abdominal pain                        | 1             |
|                                                                     | Duodenal ulcer                        | 1             |
|                                                                     | Gastrointestinal haemorrhage          | 1             |
|                                                                     | Intestinal perforation                | 1             |
| <b>Immune system disorders</b>                                      | Vasculitis                            | 3             |
| <b>Infections and infestations</b>                                  | Gastroenteritis Escherichia coli      | 1             |
|                                                                     | Pneumonia/respiratory tract infection | 9             |
|                                                                     | Urinary tract infection               | 3             |
| <b>Injury, poisoning, procedural complications / investigations</b> | Wound dehiscence                      | 1             |
| <b>Complications / investigations</b>                               | Medical observation                   | 1             |
| <b>Malignancy</b>                                                   | B-cell lymphoma                       | 1             |
| <b>Nervous system disorders</b>                                     | Cerebrovascular accident              | 1             |
| <b>Renal and urinary disorders</b>                                  | Enterovesical fistula                 | 1             |
|                                                                     | Renal impairment                      | 1             |
| <b>Respiratory, thoracic and mediastinal disorders</b>              | Laryngeal stenosis                    | 3             |
| <b>Surgical and medical procedures</b>                              | Small intestinal resection            | 1             |
| <b>Vascular disorders</b>                                           | Aortic dissection                     | 1             |
|                                                                     | Deep vein thrombosis                  | 5             |
|                                                                     | Pulmonary embolism                    | 3             |
